# Supplementary material
Source: PubMed Central journal article supplement (PMC2735993)
Supplement: pp.109.140434_1.pdf [file pp.109.140434_1.pdf]

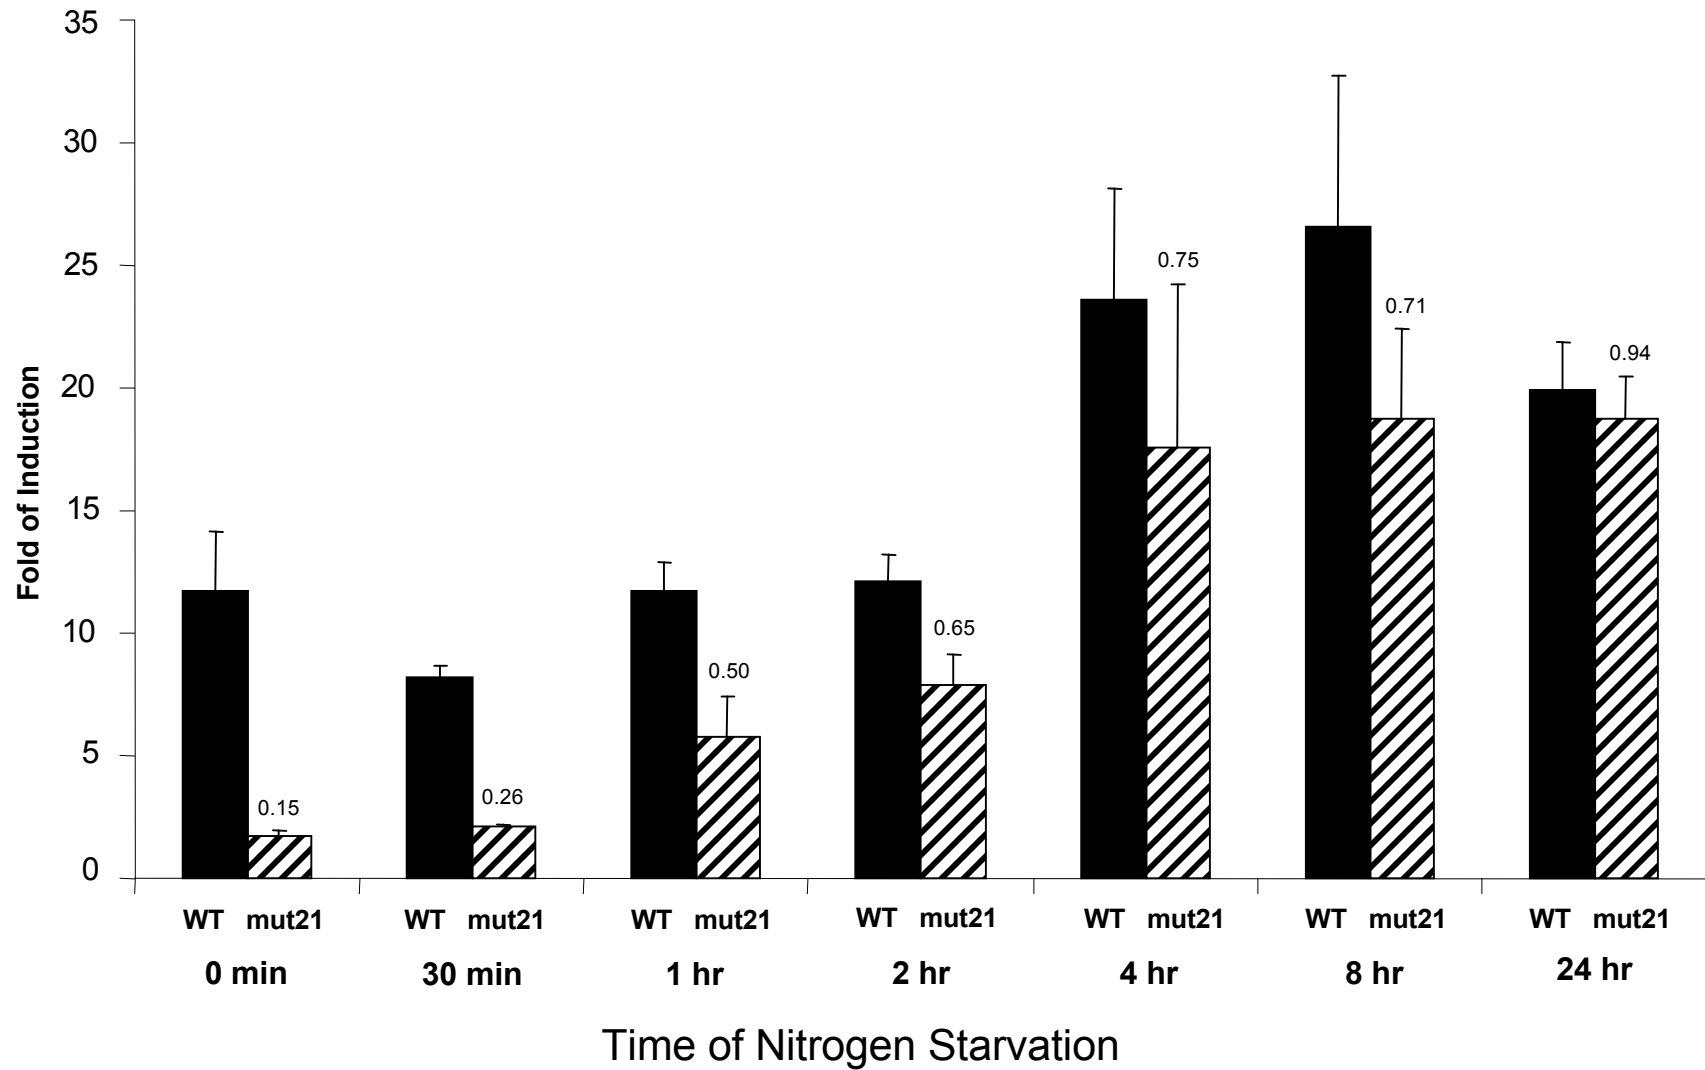

**Supp Fig. 1.** Effects of nitrogen starvation time on nitrate induction of *NiR*.

Plants were grown in aseptic hydroponics on 2.5 mM ammonium succinate, as described in Materials and Methods. After 6 days, plants were transferred to fresh media with 2.5 mM ammonium succinate. On day 7, seedlings were rinsed once with N-free medium (the same medium with nitrogen source omitted) and transferred to 100 ml of fresh N-free medium and incubated for times as indicated before treatment with either 1 mM KCl or 1 mM KNO<sub>3</sub> for 30 min. Relative *NiR* mRNA levels from roots were assayed by qPCR. Error bars represent standard deviation (n=3). Numbers above the bars show the ratios of fold of induction of mutant vs. wild-type.

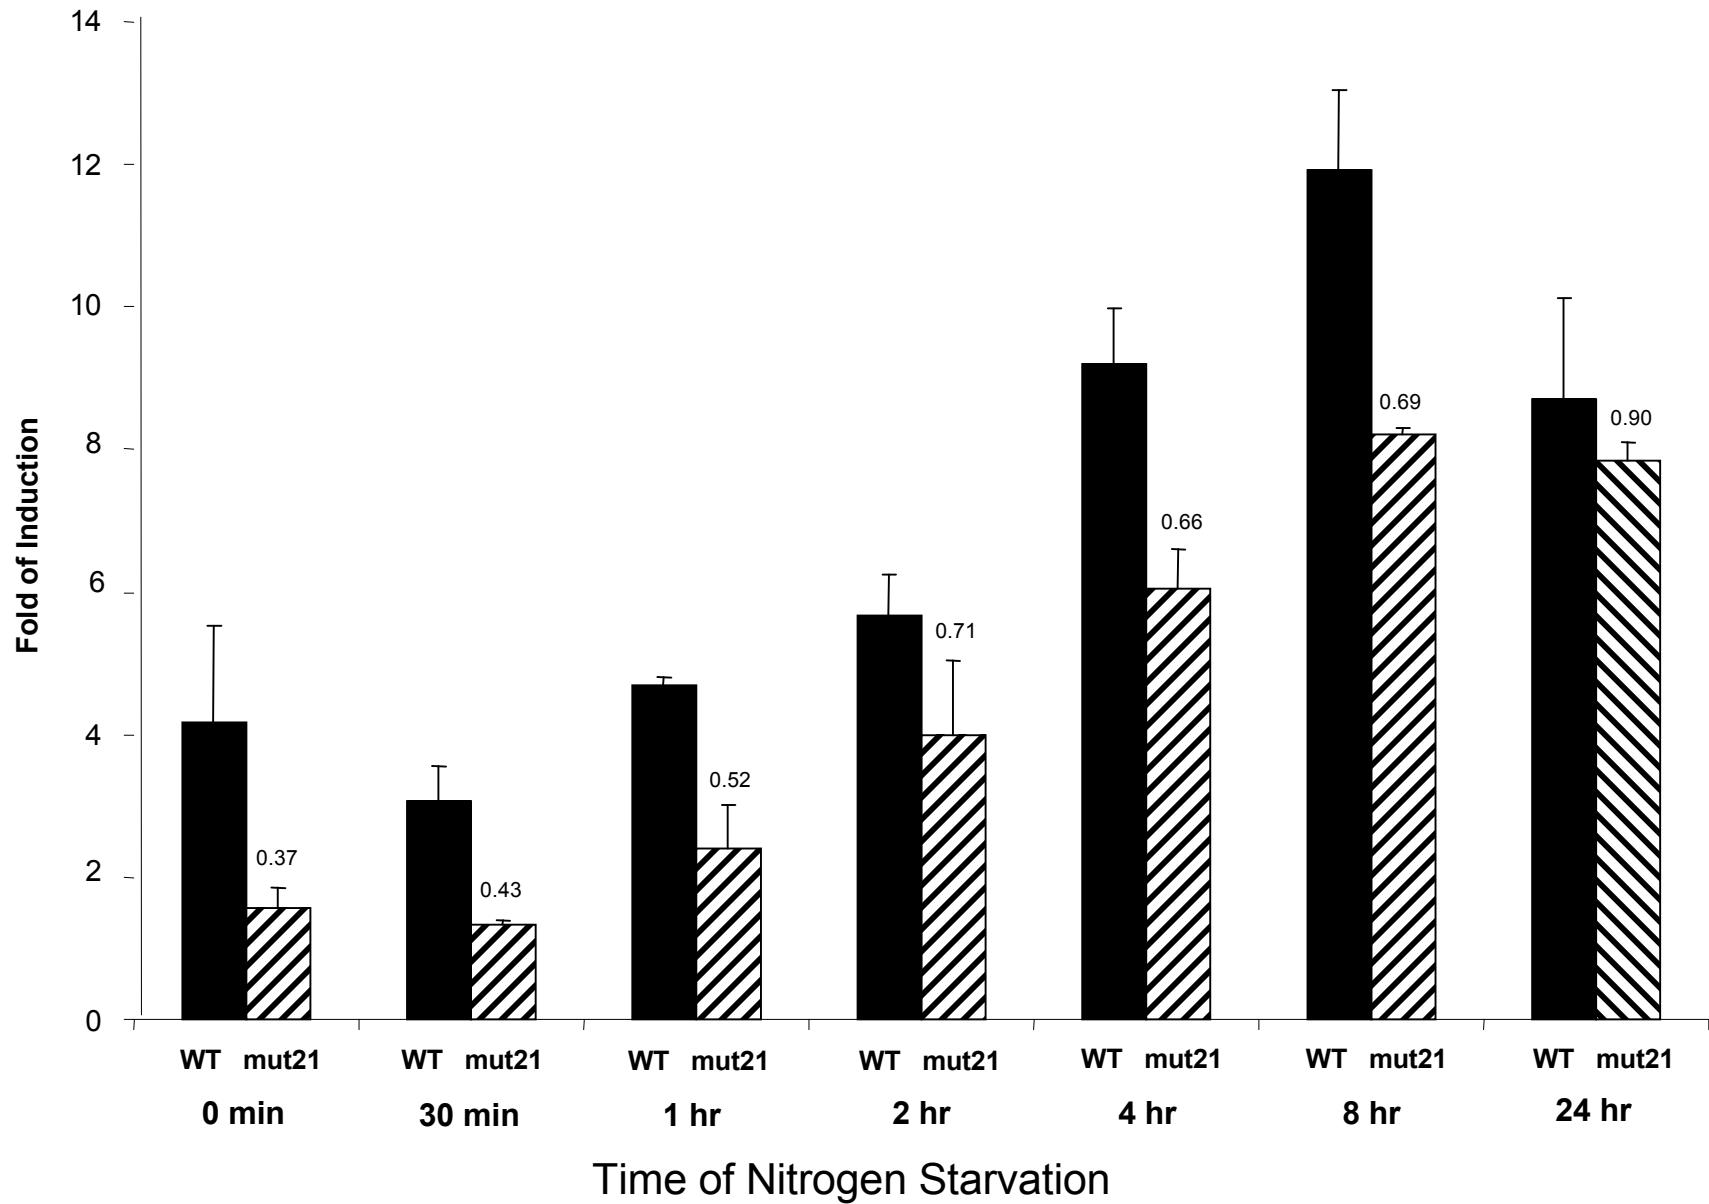

**Supp Fig. 2.** Effects of nitrogen starvation time on nitrate induction of *NIA1*.

Plants were grown and treated as described in legend 1. Fold induction is based on relative *NIA1* mRNA levels from roots assayed by qPCR. Error bars represent standard deviation (n=3). Numbers above the bars show the ratios of fold of induction of mutant vs. wild-type.

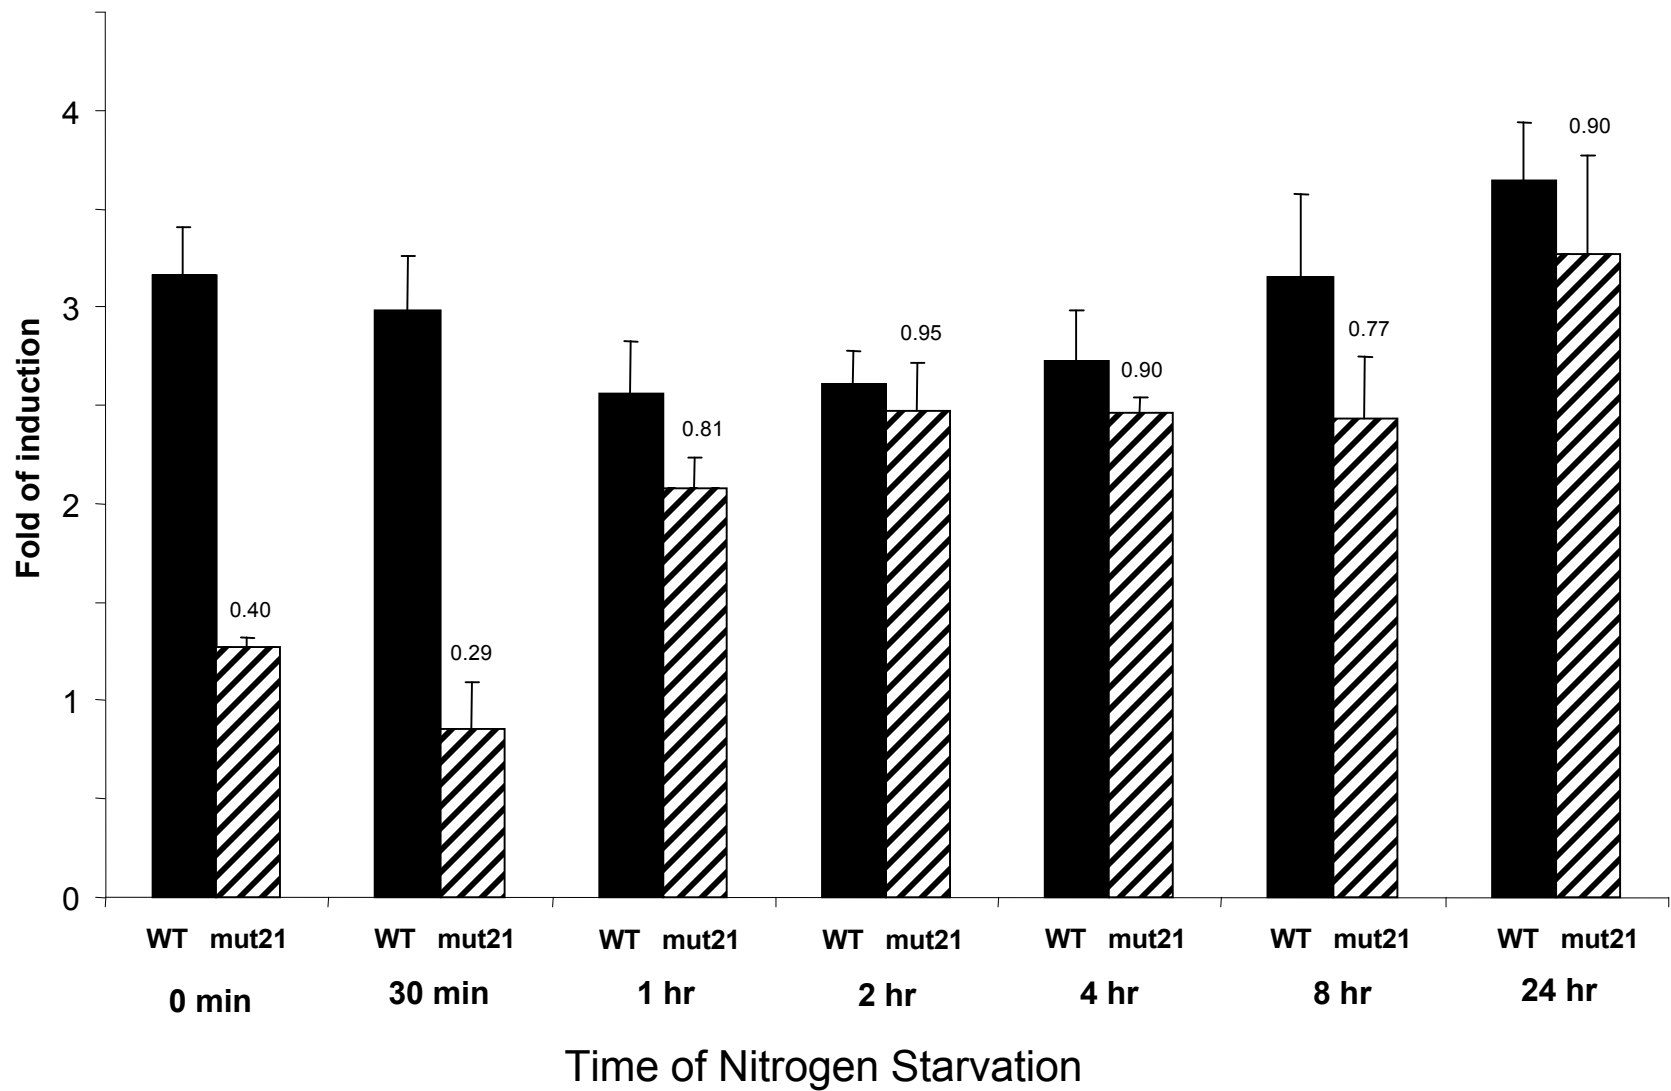

**Supp Fig. 3.** Effects of nitrogen starvation time on nitrate induction of *NRT2.1*.

Plants were grown and treated as described in legend 1. Fold induction is based on relative *NRT2.1* mRNA levels from roots assayed by qPCR. Error bars represent standard deviation (n=3). Numbers above the bars show the ratio of fold of induction of mutant vs. wildtype.

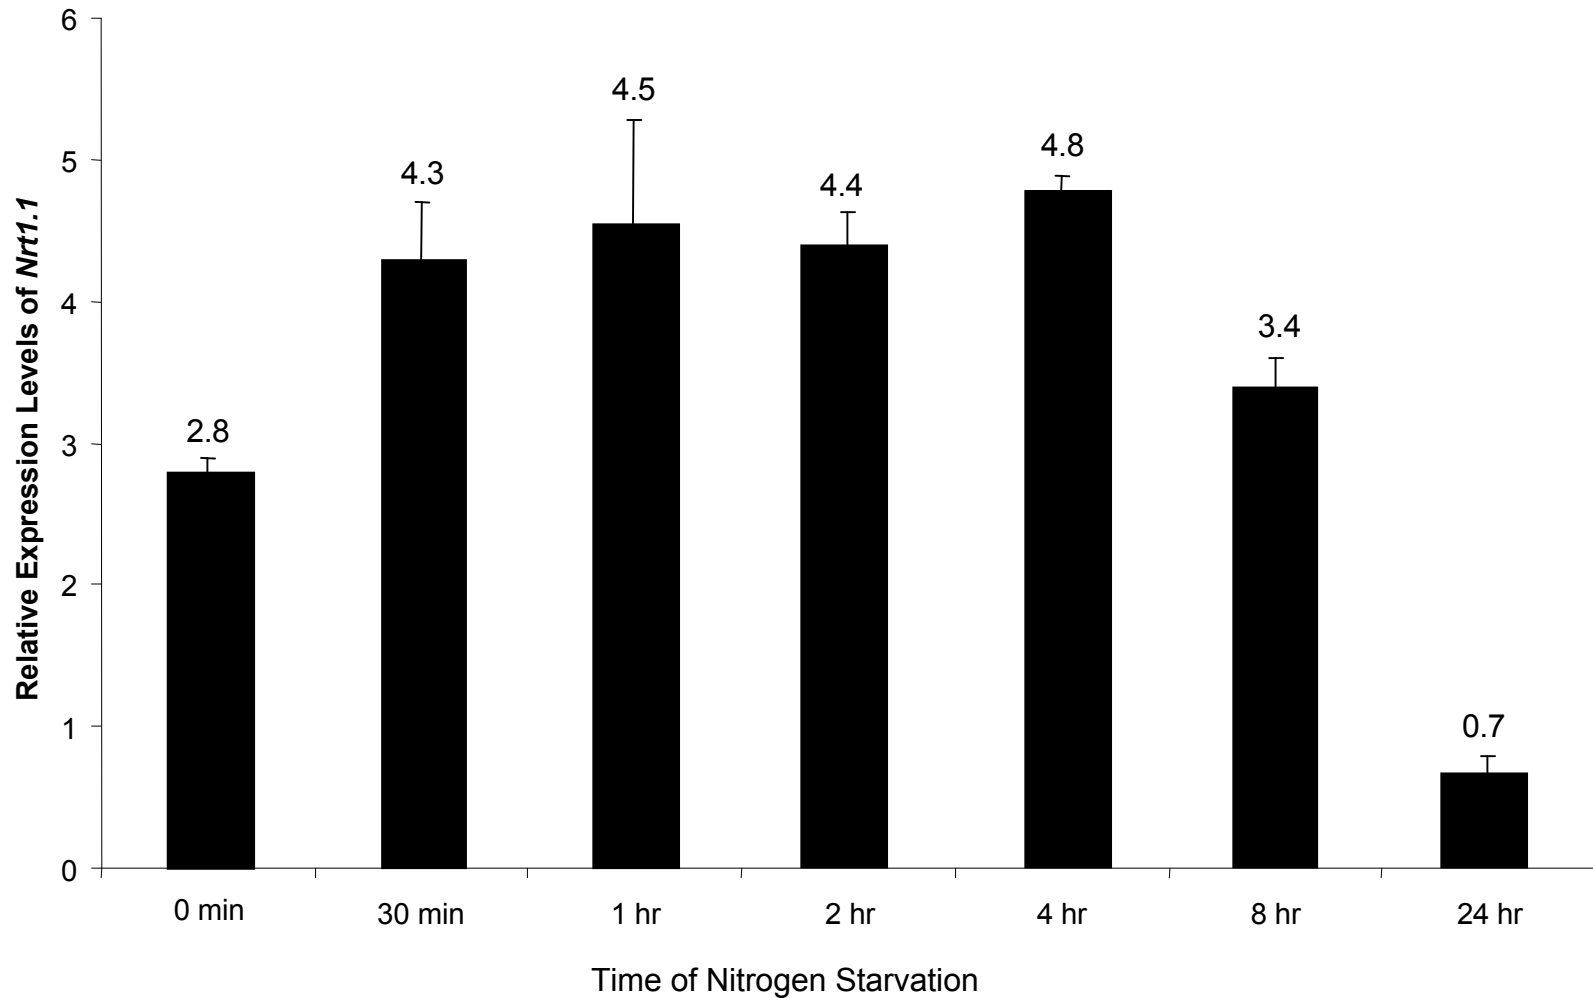

**Supp Fig. 4.** *NRT1.1* mRNA levels in response to N deprivation time.

Plants were grown and treated as described in legend 1. Note that relative *NRT1.1* mRNA levels (assayed by qPCR) from roots treated with 1 mM  $\text{KNO}_3$  for 30 min are shown (not induction ratios, which were 2-3-fold for all time points). Values were normalized to the relative expression level of *NRT1.1* in roots treated with KCl at time zero. Error bars represent standard deviation (n=3). Numbers above the bars show the relative values.
